# Supplementary material for: Heterojunction cobalt–iron fluorides deposited on MXene for enhancing the oxygen evolution reaction
Source: Royal Society of Chemistry journal article supplement (doi:10.1039/d5cc06039g), 2025-12-03
Supplement: d5cc06039g1.pdf [file d5cc06039g1.pdf]

## Supporting Information

### **Heterojunction cobalt-iron fluorides deposited on MXene for enhanced oxygen evolution reaction**

Qiaowei Wang<sup>a,b,c</sup>, Qiongdan Xie<sup>a,b</sup>, Shuli Wang<sup>c</sup> and Ligang Feng<sup>c\*</sup>

<sup>a</sup> School of New Energy and intelligent Networked Automobile, Sanya University, Sanya, 572018, PR China. E-mail: qiaoweiwang@sanyau.edu.cn

<sup>b</sup> New Energy and Intelligent Vehicle Engineering Research Center of Hainan Province  
Sanya, 572018, PR China.

<sup>c</sup> School of Chemistry and Chemical Engineering, Yangzhou University, Yangzhou 225002, P.R. China. E-mail: ligang.feng@kust.edu.cn, fenglgl1@gmail.com

## **1. Experimental Section**

### **1.1 Materials**

Cobalt nitrate hexahydrate ( $\text{Co}(\text{NO}_3)_2 \cdot 6\text{H}_2\text{O}$ ), Iron nitrate nonahydrate ( $\text{Fe}(\text{NO}_3)_3 \cdot 9\text{H}_2\text{O}$ ), Ammonium fluoride ( $\text{NH}_4\text{F}$ ), Urea ( $\text{CH}_4\text{N}_2\text{O}$ ),  $\text{Ti}_3\text{AlC}_2$  (MAX), dicyanodiamide Nafion (5wt%) were purchased from Sigma-Aldrich. Ethanol was purchased from Sinopharm Chemical Reagent Beijing Co. LTD. All chemicals used were of analytical grade and used without further purification in this study. All solutions were prepared with ultrapure water with a resistance of  $18.2 \text{ M}\Omega$  (Thermo Fisher Scientific Co. LTD, USA).

### **1.2 Synthesis of the catalysts**

#### **1.2.1 Synthesis of $\text{Ti}_3\text{C}_2\text{T}_x$ MXene**

$\text{Ti}_3\text{C}_2\text{T}_x$  MXene was fabricated by etching of  $\text{Ti}_3\text{AlC}_2$  (MAX) powder. In general,  $\text{Ti}_3\text{AlC}_2$  powder (2 g) was slowly added to a 40 % HF solution (30 mL) and stirred for 24 h at room temperature. The resulting product was centrifuged at 3000 rpm for 5 minutes and washed several times with deionized water. Finally, the as-formed product was dried in a vacuum oven at  $60^\circ\text{C}$  for 12 h to obtain the  $\text{Ti}_3\text{C}_2\text{T}_x$  MXene.

#### **1.2.2 Synthesis of Cobalt-Iron Precursor/MXene**

Cobalt-iron precursor /MXene was prepared by the oil bath method. First, 1.66 g  $\text{Co}(\text{NO}_3)_2 \cdot 6\text{H}_2\text{O}$ , 2.81g  $\text{Fe}(\text{NO}_3)_3 \cdot 9\text{H}_2\text{O}$ , 0.42 g  $\text{NH}_4\text{F}$ , and 1.71 g urea were added to a beaker. Then add 40 ml of deionized water, stir for 10min under the condition of magnetic stirring, then add 0.1 g of MXene, and sonicate for 45 min to form a homogeneous solution. The mixture was then transferred to a three-necked flask, and a condensing reflux unit was set up and finally heated for 6 hours with stirring in an oil bath at  $150^\circ\text{C}$ . When the suspension cools naturally to room temperature, it is washed several times with ultrapure water by filtration. The product is collected and dried overnight in a vacuum drying oven at  $60^\circ\text{C}$ .

#### **1.2.3 Synthesis of $\text{Co}(\text{OH})\text{F}$ /MXene**

$\text{Co}(\text{OH})\text{F}$ /MXene was prepared by the oil bath method. First, 1.66 g  $\text{Co}(\text{NO}_3)_2 \cdot 6\text{H}_2\text{O}$ , 0.42 g  $\text{NH}_4\text{F}$ , and 1.71 g urea were added to a beaker. Then add 40ml of deionized water, stir for 10 min under the condition of magnetic stirring, then add 0.1 g of MXene, and sonicate for 45 min to form a homogeneous solution. The mixture was then transferred to a three-necked flask, and a condensing reflux unit was set up and finally heated for 6 hours with stirring in an oil bath at  $150^\circ\text{C}$ . When the suspension cools naturally to room temperature, it is washed several times with ultrapure water by filtration. The product is collected and dried overnight in a vacuum drying oven at  $60^\circ\text{C}$ .

#### **1.2.4 Synthesis of iron precursor/MXene**

Iron precursor/MXene was prepared by the oil bath method. First, 2.81g  $\text{Fe}(\text{NO}_3)_3 \cdot 9\text{H}_2\text{O}$ , 0.42 g  $\text{NH}_4\text{F}$ , and 1.71 g urea were added to a beaker. Then add 40 ml of deionized water, stir for 10min under the condition of magnetic stirring, then add 0.1 g of MXene, and sonicate for 45 min to form a homogeneous solution. The mixture was then transferred to a three-necked flask, and a condensing reflux unit was set up and finally heated for 6 hours with stirring in an oil bath at  $150^\circ\text{C}$ . When the

suspension cools naturally to room temperature, it is washed several times with ultrapure water by filtration. The product is collected and dried overnight in a vacuum drying oven at 60 °C.

#### 1.2.5 Synthesis of CoF<sub>2</sub>/FeF<sub>2</sub>@MXene

The obtained Cobalt-iron precursor/MXene was prepared in a tube furnace for low-temperature fluoridation etching treatment. The Cobalt-iron precursor/MXene and ammonium fluoride (NH<sub>4</sub>F) were placed at two separate positions of a porcelain boat with a mass ratio of 1:10 (w/w) in the furnace in a nitrogen gas atmosphere at 400 °C for 2 h. The resulting product was thoroughly washed with deionized water and ethanol and then dried in a vacuum oven at 60 °C for 12 h.

#### 1.2.6 Synthesis of Co(OH)F/MXene

The obtained Co(OH)F/MXene was prepared in a tube furnace for low-temperature fluoridation etching treatment. The Co(OH)F/MXene and ammonium fluoride (NH<sub>4</sub>F) were placed at two separate positions of a porcelain boat with a mass ratio of 1:10 (w/w) in the furnace in a nitrogen gas atmosphere at 350 °C for 2 h. The resulting product was thoroughly washed with deionized water and ethanol and then dried in a vacuum oven at 60 °C for 12 h.

#### 1.2.7 Synthesis of FeF<sub>2</sub>/MXene

The obtained iron precursor/MXene was prepared in a tube furnace for low-temperature fluoridation etching treatment. The iron precursor/MXene and ammonium fluoride (NH<sub>4</sub>F) were placed at two separate positions of a porcelain boat with a mass ratio of 1:10 (w/w) in the furnace in a nitrogen gas atmosphere at 450 °C for 2 h. The resulting product was thoroughly washed with deionized water and ethanol and then dried in a vacuum oven at 60 °C for 12 h.

It is important to clarify that NH<sub>4</sub>F was introduced during the precursor preparation step primarily as a morphology-directing and structure-regulating agent, rather than as the main source of fluorine in the final product. The fluorine in the crystalline CoF<sub>2</sub>/FeF<sub>2</sub> active phase originates predominantly from the low-temperature fluoridation etching process since without this step, the fluoride can not be obtained.

In the precursor synthesis, the F-ions coordinate with metal ions and modulate crystallization kinetics, facilitating the formation of a well-structured metal hydroxyfluoride precursor with defined nanosheet morphology. If NH<sub>4</sub>F were omitted, the absence of such regulation would lead to rapid and disordered precipitation, resulting in the formation of bulky oxide/hydroxide aggregates with significantly reduced specific surface area and limited exposure of active sites. Therefore, while NH<sub>4</sub>F in the precursor step is indispensable for constructing the optimal intermediate morphology, the fluorine atoms constituting the final active fluoride phase are incorporated mainly during the subsequent fluoridation etching step.

Noted that the temperature selection was based on the distinct fluorination behaviors of the cobalt and iron precursors. The cobalt-based precursor undergoes fluorination readily at relatively low temperatures, while excessively high temperatures may lead to over-crystallization or partial decomposition of CoF<sub>2</sub>. In contrast, the iron precursor requires a higher temperature to complete the fluorination reaction and form FeF<sub>2</sub>, due to the higher bond formation energy of Fe-F, which

demands stronger thermal driving force. For the bimetallic cobalt-iron precursor, an intermediate temperature of 400 °C was chosen to facilitate the simultaneous formation of CoF<sub>2</sub> and FeF<sub>2</sub>, promoting the construction of a heterojunction structure while avoiding excessive crystallization or decomposition of either component<sup>1-3</sup>.

## 2. Physical characterizations

Powder X-ray diffraction (XRD) patterns were recorded on a Bruker D8 Advance powder X-ray diffractometer using a Cu K<sub>α</sub> ( $\lambda = 1.5405 \text{ \AA}$ ) radiation source operating at 40 kV and 30 mA at a scanning rate of 5° min<sup>-1</sup>. The morphology and microstructure of the product were analyzed by scanning electron microscope (SEM, S4800II) and transmission electron microscopy (TEM, Philips, Tecnai 12 F30 S-TWIN). High-resolution TEM (HRTEM) was conducted on a TECNAI G2 operating at 200 kV. X-ray photoelectron spectroscopy (XPS) measurements were carried out on an ESCALAB250Xi spectrometer with an Al K<sub>α</sub> radiation source.

## 3. Electrochemical measurements

All the electrochemical measurements were tested in a typical three-electrode system linked to a Bio-Logic SAS analyzer (France). Our catalyst electrode served as the working electrode with a graphite rod as the counter electrode; a mercury/mercury oxide electrode (Hg/HgO) as the reference electrode was employed through a double salt bridge and lugging capillary, and it was calibrated before and after the experiments to ensure the accuracy. A glassy carbon electrode (GCE, 3.0 mm diameter) was used to support the catalysts. The working electrode was prepared as follows: 5 mg of catalyst was dispersed entirely into the mixture of 50  $\mu\text{L}$  Nafion and 950  $\mu\text{L}$  ethanol, and ultrasonicated for 30 min to form a uniform catalyst suspension. Then, 10  $\mu\text{L}$  of the catalyst suspension was loaded dropwise onto the GCE. The prepared working electrode was placed in 1 M KOH and treated with N<sub>2</sub> for electrochemical testing. All the potentials used were converted into RHE: ( $E_{(\text{RHE})} = E_{(\text{Hg/HgO})} + 0.0591 \cdot \text{pH} + 0.098 \text{ V}$ ). The catalytic performance of the samples for OER was evaluated by linear scan voltammetry (LSV), and the scanning rate was 5 mV s<sup>-1</sup>.

The electrochemical impedance spectroscopy (EIS) frequency range was 1000 kHz ~ 0.01Hz. The chronoamperometry (CA) was measured at a constant potential of 1.48 V vs RHE for 30 h. All tests were carried out at room temperature (around 25 °C), and all LSV curves were corrected without iR compensation.

To estimate the effective surface areas of catalysts, we measured the double-layer capacitance ( $C_{\text{dl}}$ ) by the cyclic voltammetry (CV) method by varying the scan rate (20, 40, 60, 80, and 100 mV s<sup>-1</sup>) in the non-Faradaic region from 0.89 to 0.99 V vs RHE. By plotting  $\Delta j = 1/2 (j_{\text{anodic}} - j_{\text{cathodic}})$  at the middle potential (0.94 V) against the scanning rates, the linear slope is  $C_{\text{dl}}$ .  $j_{\text{anodic}}$  and  $j_{\text{cathodic}}$  are anodic and cathodic current densities at the anode (>0) and cathode (<0), respectively. The electrochemically active surface area (ECSA) was achieved by normalizing the  $C_{\text{dl}}$  to a standard-

specific capacitance. ECSA was calculated according to the following equations S1, 40  $\mu\text{F cm}^{-2}$  was adopted as the specific capacitance ( $C_s$ ) value, as regards previous reports <sup>4, 5</sup>, and S is the surface area of the electrode (here is 0.07  $\text{cm}^2$ ):

$$\text{Equation S1: } ECSA = \frac{C_{dl} * S}{C_s}$$

The turnover frequency (TOF) values were calculated from the equation S2:

$$\text{Equation S2: } TOF = \frac{j * S}{4 * F * m}$$

Where  $j$  is the current density at a specific potential, F is the Faraday constant (96485 C  $\text{mol}^{-1}$ ) and m is the number of moles of active materials.

#### 4. Density functional theory (DFT) calculation

DFT calculations were performed using the CASTEP module of the Materials Studio software (Accelrys Inc.). The generalized gradient approximation method (GGA) with the Perdew-Burke-Ernzerhof (PBE) functional was used to describe the exchange and correlation interactions <sup>6, 7</sup>. The interactions between valence electrons and ionic cores were described by Ultrasoft pseudo-potential and dispersion adjustment using DFT-D correction. The electronic wave functions were expanded on a plane wave basis with a cut-off energy of 380 eV, and the self-consistent field (SCF) tolerance is  $1.0 \times 10^{-6}$  eV/atom. The optimization is completed when the energy, maximum force, maximum stress, and maximum displacement are less than  $5.0 \times 10^{-6}$  eV/atom, 0.01 eV/Å, 0.02 GPa, and  $5.0 \times 10^{-4}$  Å, respectively. A vacuum slab with a thickness greater than 15 Å was used in the z-direction. The Gibbs free energy of the reaction and the Gibbs free energy of the adsorption intermediate can be obtained from equation S3 <sup>8</sup>:

$$\text{Equation S3: } \Delta G = \Delta E + \Delta ZPE - T\Delta S$$

where  $\Delta E$  is the energy of the reaction, ZPE is the zero-point energy change, and  $\Delta S$  is the entropy change.

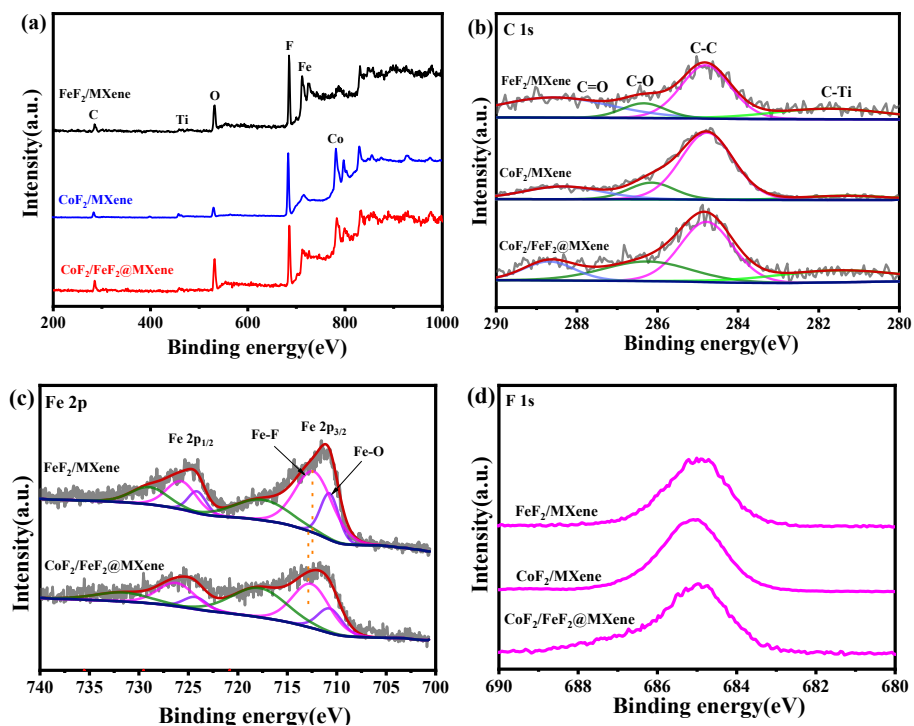

**Fig. S1.** (a) The XPS survey spectra; High-resolution XPS spectrum for (b) C 1s of FeF<sub>2</sub>/MXene, CoF<sub>2</sub>/MXene and CoF<sub>2</sub>/FeF<sub>2</sub>@MXene; (c) Fe 2p of FeF<sub>2</sub>/MXene and CoF<sub>2</sub>/FeF<sub>2</sub>@MXene (d) F 1s of FeF<sub>2</sub>/MXene, CoF<sub>2</sub>/MXene and CoF<sub>2</sub>/FeF<sub>2</sub>@MXene.

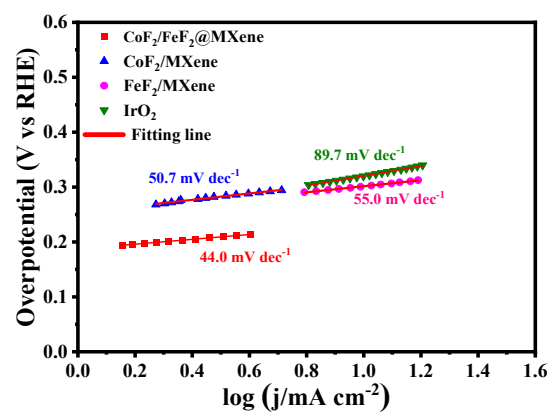

**Fig. S2.** Corresponding OER Tafel plots.

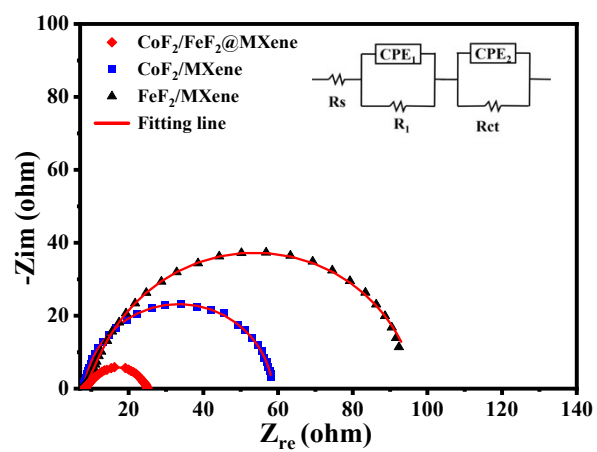

**Fig. S3.** Nyquist plots of the CoF<sub>2</sub>/FeF<sub>2</sub>@MXene, CoF<sub>2</sub>/MXene and FeF<sub>2</sub>/MXene.



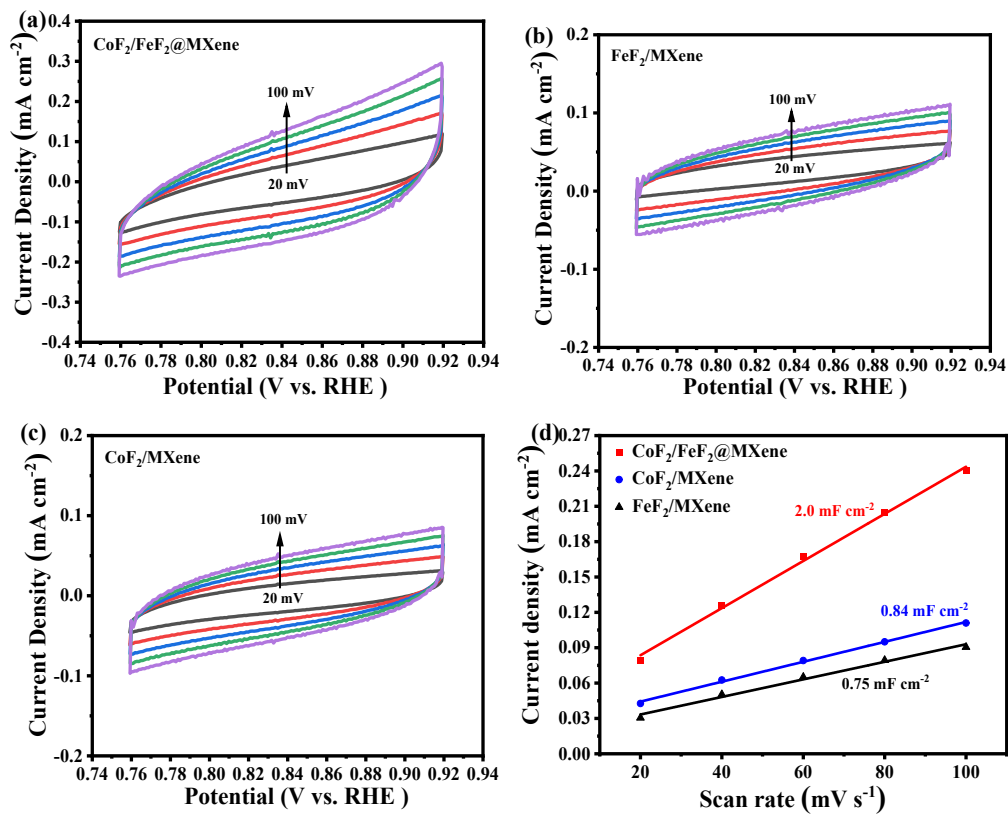

**Fig. S4.** CV curves of (a)  $\text{CoF}_2/\text{FeF}_2@\text{MXene}$ , (b)  $\text{FeF}_2/\text{MXene}$  and (c)  $\text{CoF}_2/\text{MXene}$  samples in the non-faradaic capacitance current range from 0.75 V to 0.91 V (vs RHE) at scan rates of 20, 40, 60, 80 and 100  $\text{mV s}^{-1}$ . (d) The  $C_{dl}$  values of  $\text{CoF}_2/\text{FeF}_2@\text{MXene}$ ,  $\text{CoF}_2/\text{MXene}$  and  $\text{FeF}_2/\text{MXene}$  samples.

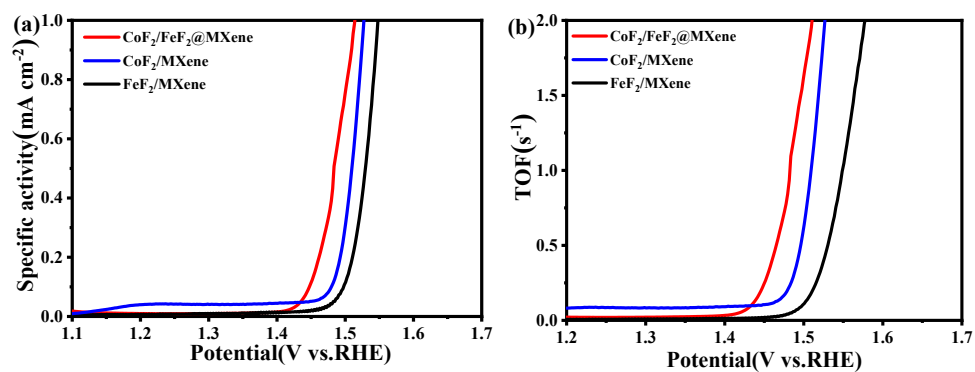

**Fig. S5.** (a) The specific activity of CoF<sub>2</sub>/FeF<sub>2</sub>@MXene, CoF<sub>2</sub>/MXene and FeF<sub>2</sub>/MXene. (b) TOF curves of CoF<sub>2</sub>/FeF<sub>2</sub>@MXene, CoF<sub>2</sub>/MXene and FeF<sub>2</sub>/MXene.

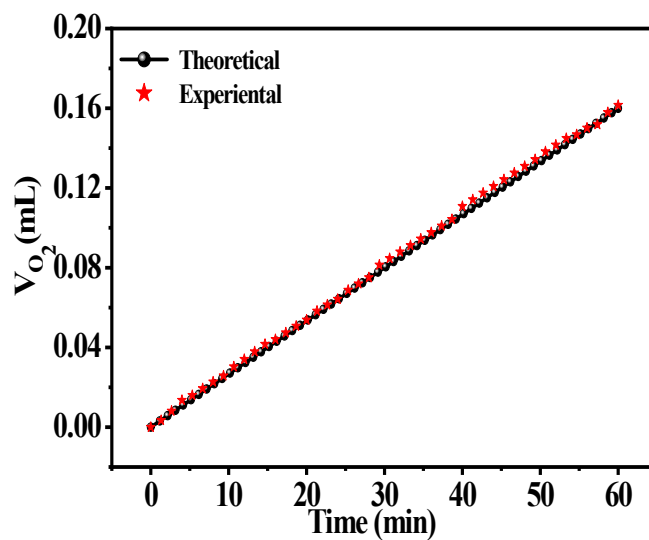

**Fig. S6** The Faradaic efficiency curve of CoF<sub>2</sub>/FeF<sub>2</sub>@MXene in 1 M KOH solution.

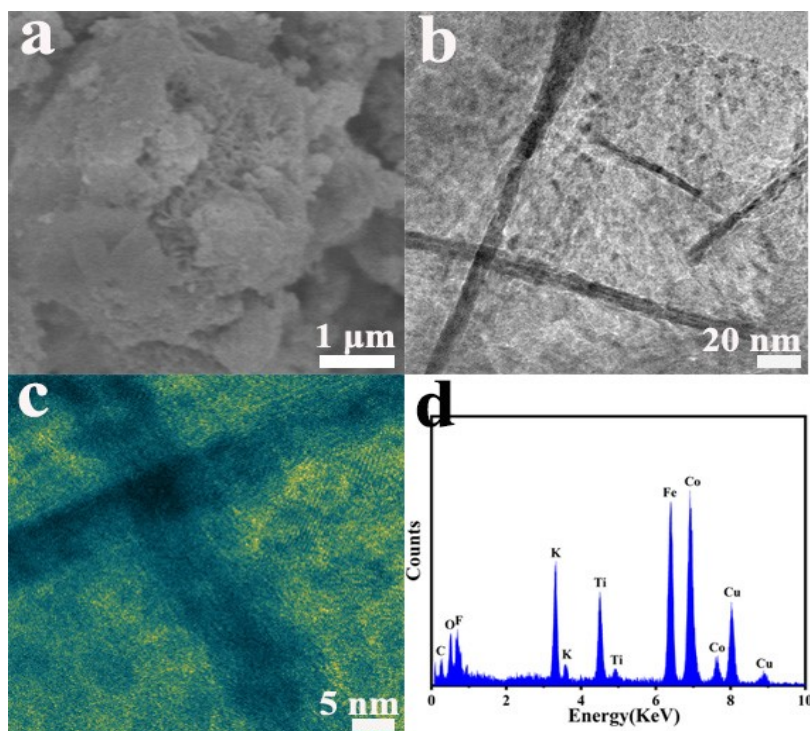

**Fig. S7.** (a) SEM images. (b)TEM images. (c) HRTEM images. (d) EDX spectra of  $\text{CoF}_2/\text{FeF}_2@\text{MXene}$  after electrochemical testing.

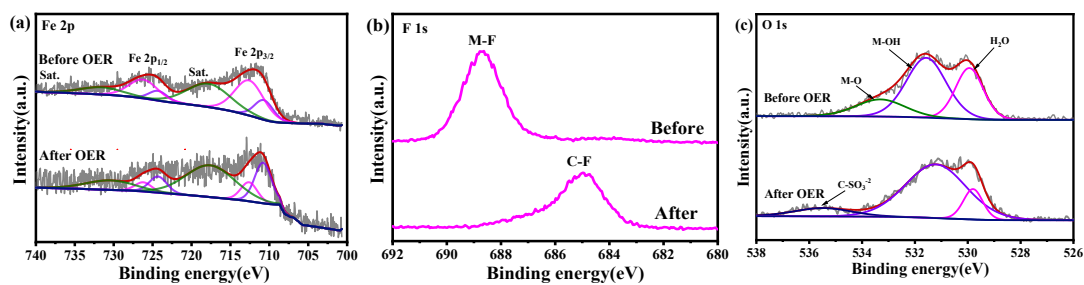

**Fig. S8.** High-resolution XPS spectrum for (a)Fe 2p; (b) F 1s and (c) O 1s before and after the OER test for  $\text{CoF}_2/\text{FeF}_2@\text{MXene}$ .

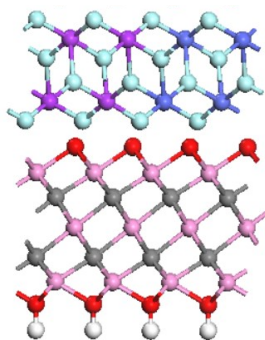

**Fig. S9.** The model of  $\text{CoF}_2/\text{FeF}_2@\text{Mxene}$

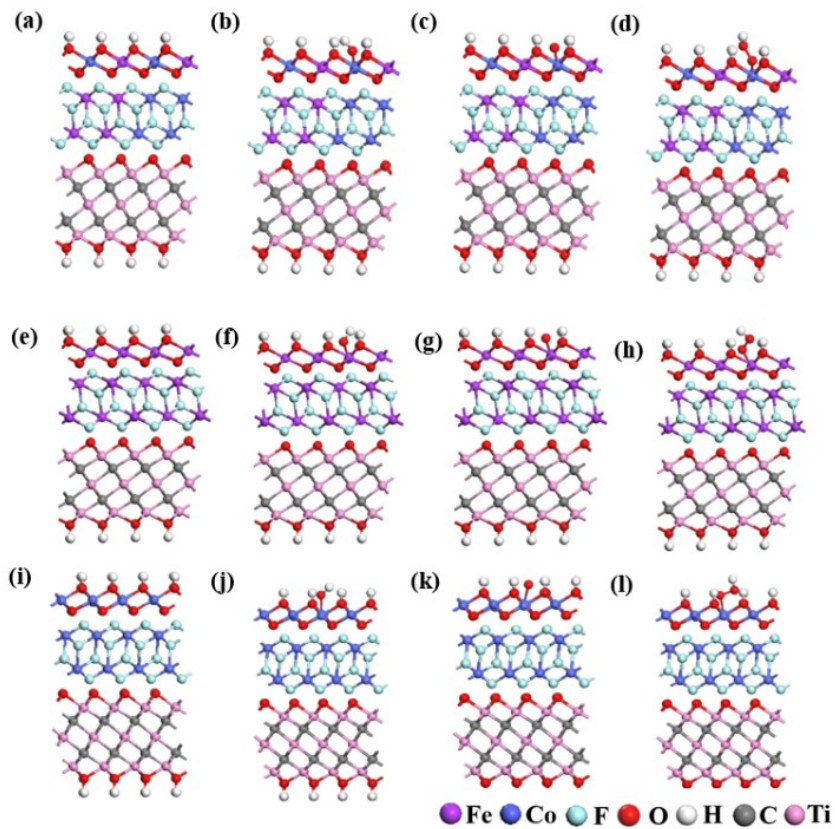

**Fig. S10.** A model for the adsorption of reaction intermediates on (a-d)  $\text{CoF}_2/\text{FeF}_2@\text{Mxene}$ , (e-h)

FeF<sub>2</sub>/MXene and (i-l) FeF<sub>2</sub>/Mxene surfaces.

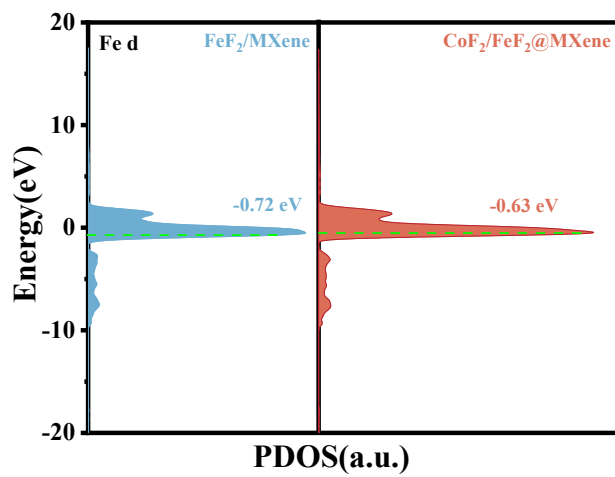

**Fig.S11.** PDOS of Fe d for FeF<sub>2</sub>/MXene and CoF<sub>2</sub>/FeF<sub>2</sub>@MXene.

**Table S1** The detailed binding energy of Co elements for CoF<sub>2</sub>/FeF<sub>2</sub>@MXene and CoF<sub>2</sub>/MXene.

| Catalysts                                 | Co 2p <sub>3/2</sub> |                   | Co 2p <sub>1/2</sub> |                   | Relative content/% |
|-------------------------------------------|----------------------|-------------------|----------------------|-------------------|--------------------|
|                                           | Peak                 | Binding energy/eV | Peak                 | Binding energy/eV |                    |
| CoF <sub>2</sub> /FeF <sub>2</sub> @MXene | Co-O                 | 781.5             | Co-O                 | 797.8             | 19.7%              |
|                                           | Co-F                 | 783.3             | Co-F                 | 799.6             | 80.3%              |
| CoF <sub>2</sub> /MXene                   | Co-O                 | 781.5             | Co-O                 | 797.8             | 11.0%              |
|                                           | Co-F                 | 783.3             | Co-F                 | 799.6             | 89.0%              |

**Table S2.** The detailed binding energy of Fe elements for CoF<sub>2</sub>/FeF<sub>2</sub>@MXene and FeF<sub>2</sub>/MXene.

| Catalysts                                 | Fe 2p <sub>3/2</sub> |                   | Fe 2p <sub>1/2</sub> |                   | Relative content/% |
|-------------------------------------------|----------------------|-------------------|----------------------|-------------------|--------------------|
|                                           | Peak                 | Binding energy/eV | Peak                 | Binding energy/eV |                    |
| CoF <sub>2</sub> /FeF <sub>2</sub> @MXene | Fe-F                 | 712.6             | Fe-F                 | 726.2             | 74.0%              |
|                                           | Fe-O                 | 710.7             | Fe-O                 | 724.3             | 26.0%              |
| FeF <sub>2</sub> /MXene                   | Fe-F                 | 712.3             | Fe-F                 | 725.9             | 71.7%              |
|                                           | Fe-O                 | 710.6             | Fe-O                 | 724.2             | 28.3%              |

**Table S3.** The comparison of some representative OER electrocatalysts in alkaline electrolyte.

| Materials                                                        | Electrode substrate | Overpotential (mV)       | R <sub>f</sub> |
|------------------------------------------------------------------|---------------------|--------------------------|----------------|
|                                                                  |                     | @ 10 mA cm <sup>-2</sup> |                |
| CoF <sub>2</sub> /FeF <sub>2</sub> @MXene                        | GCE                 | 230                      | This work      |
| MXene@CoS/FeS <sub>2</sub>                                       | GCE                 | 278                      | 9              |
| NiSe–NiO/Ta <sub>4</sub> C <sub>3</sub> T <sub>x</sub> MXene     | GCE                 | 255                      | 10             |
| NiO-Ni <sub>3</sub> Se <sub>4</sub> /MXene                       | GCE                 | 260                      | 11             |
| Ni/NiO <sub>150</sub>                                            | GCE                 | 280                      | 12             |
| Ag/CoMo-LDH                                                      | GCE                 | 290                      | 13             |
| FeNi LDH/FeNi <sub>2</sub> S <sub>4</sub>                        | GCE                 | 259                      | 14             |
| CoFe <sub>2</sub> O <sub>4</sub> /β-Ni(OH) <sub>2</sub>          | GCE                 | 278                      | 15             |
| CoOx/FeOx/CNTs                                                   | GCE                 | 308                      | 16             |
| Co/CoS <sub>2</sub>                                              | GCE                 | 349                      | 17             |
| MXene@TiO <sub>2</sub> /FeP                                      | nickel foam         | 240                      | 18             |
| NU-1000/CuCo <sub>2</sub> S <sub>4</sub>                         | nickel foam         | 335                      | 19             |
| Fe <sub>2</sub> O <sub>3</sub> /ZnCo <sub>2</sub> O <sub>4</sub> | nickel foam         | 261                      | 20             |
| Co(CO <sub>3</sub> ) <sub>0.5</sub> OH/Cu                        | nickel foam         | 253                      | 21             |
| CoNiLDH/FeOOH                                                    | nickel foam         | 250                      | 22             |
| Co <sub>2</sub> Ni-MOF@MX-1                                      | carbon paper        | 265                      | 23             |
| FeS/Co <sub>3</sub> S <sub>4</sub>                               | carbon cloth        | 252                      | 24             |
| NiSe <sub>2</sub> /FeSe <sub>2</sub>                             | carbon cloth        | 256                      | 25             |
| CoFe-Co <sub>x</sub> N@NC                                        | carbon cloth        | 270                      | 26             |
| Ni(OH) <sub>2</sub> /g-C <sub>3</sub> N <sub>4</sub>             | platinum plate      | 240                      | 27             |

**Table S4.** EIS fitting parameters from equivalent circuits for CoF<sub>2</sub>/FeF<sub>2</sub>@MXene, CoF<sub>2</sub>/MXene and FeF<sub>2</sub>/MXene samples in 1 M KOH.

| Samples                                   | $R_s/\Omega$ | $R_{ct}/\Omega$ | $R_0/\Omega$ | CHI/S s <sup>-n</sup> |
|-------------------------------------------|--------------|-----------------|--------------|-----------------------|
| CoF <sub>2</sub> /FeF <sub>2</sub> @MXene | 8.1          | 12.8            | 3.9          | 5.921e-05             |
| CoF <sub>2</sub> /MXene                   | 7.1          | 50.2            | 1.2          | 2.901e-05             |
| FeF <sub>2</sub> /MXene                   | 7.5          | 85.3            | 5.0          | 2.561e-05             |



**Table S5.**  $C_{dl}$ , ECSA and  $R_f$  for all samples.

| Catalysts                                 | $C_{dl}$ (mF cm <sup>-2</sup> ) | ECSA (cm <sup>2</sup> ) | $R_f$ |
|-------------------------------------------|---------------------------------|-------------------------|-------|
| CoF <sub>2</sub> /FeF <sub>2</sub> @MXene | 2.0                             | 3.5                     | 50.0  |
| CoF <sub>2</sub> /MXene                   | 0.84                            | 1.47                    | 21.0  |
| FeF <sub>2</sub> /MXene                   | 0.75                            | 1.31                    | 18.75 |

**Table S6.** The detailed binding energy of Co elements for CoF<sub>2</sub>/FeF<sub>2</sub>@MXene before and after the durability test.

| Catalysts                                 | Co 2p <sub>3/2</sub> |                   | Co 2p <sub>1/2</sub> |                   | Relative content/% |
|-------------------------------------------|----------------------|-------------------|----------------------|-------------------|--------------------|
|                                           | Peak                 | Binding energy/eV | Peak                 | Binding energy/eV |                    |
| CoF <sub>2</sub> /FeF <sub>2</sub> @MXene |                      |                   |                      |                   |                    |
| (Before OER)                              | C-O                  | 781.5             | C-O                  | 797.8             | 19.7%              |
|                                           | Co-F                 | 783.6             | Co-F                 | 799.9             | 80.3%              |
| CoF <sub>2</sub> /FeF <sub>2</sub> @MXene |                      |                   |                      |                   |                    |
| (After OER)                               | Co-O                 | 780.5             | Co-O                 | 796.8             | 100%               |

**Table S7.** The detailed binding energy of Fe elements for CoF<sub>2</sub>/FeF<sub>2</sub>@MXene before and after the durability test.

| Catalysts                                                 | Fe 2p <sub>3/2</sub> |                   | Fe 2p <sub>1/2</sub> |                   | Relative content/% |
|-----------------------------------------------------------|----------------------|-------------------|----------------------|-------------------|--------------------|
|                                                           | Peak                 | Binding energy/eV | Peak                 | Binding energy/eV |                    |
| CoF <sub>2</sub> /FeF <sub>2</sub> @MXene<br>(Before OER) | Fe-O                 | 710.7             | Fe-O                 | 724.3             | 26.0%              |
|                                                           | Fe-F                 | 712.6             | Fe-F                 | 726.2             | 74.0%              |
| CoF <sub>2</sub> /FeF <sub>2</sub> @MXene<br>(After OER)  | Fe-O                 | 710.9             | Fe-O                 | 724.5             | 100.0%             |

## References:

1. J. Chun, C. Jo, S. Sahgong, M. G. Kim, E. Lim, D. H. Kim, J. Hwang, E. Kang, K. A. Ryu, Y. S. Jung, Y. Kim and J. Lee, *ACS Applied Materials & Interfaces*, 2016, **8**, 35180-35190.
2. X.-G. Zhang, P. Guo, J.-F. Han and K.-Y. Ye, *Chem. Commun.*, 2020, **56**, 8512-8523.
3. M. Pietrowski, M. Zieliński, E. Alwin, A. Suchora and J. Gawarecka, *RSC Adv.*, 2019, **9**, 5711-5721.
4. X. Gu, Z. Liu, M. Li, J. Tian and L. Feng, *Appl. Catal., B*, 2021, **297**, 120462.
5. X. Gu, Z. Liu, H. Liu, C. Pei and L. Feng, *Chem. Eng. J.*, 2021, **403**, 126371.
6. Y. Feng, S. Lu, L. Fu, F. Yang and L. Feng, *Chem. Sci.*, 2024, **15**, 2123-2132.
7. D. Vanderbilt, *Physical Review B*, 1990, **41**, 7892-7895.
8. J. Xu, L. Yu, B. Dong, F. Yang and L. Feng, *J. Colloid Interface Sci.*, 2023, **654**.
9. Z. Zhang, T. Liang, C. Jin, S. Zhang, Y. Cui, J. Chen and X. Zeng, *J. Mater. Chem. A.*, 2024, **12**, 14517-14530.
10. L. Yan, J. Liang and H. Li, *Int. J. Hydrogen Energy.*, 2023, **48**, 13159-13169.
11. L. Yan, J. Liang, D. Song, X. Li and H. Li, *Adv. Funct. Mater.*, 2024, **34**, 2308345.
12. Y. Liu, Z. Liu, L. Jia, D. Gao and Z. Tang, *Appl. Surf. Sci.*, 2022, **606**, 154897.
13. X.-Z. Song, J.-C. Ni, X.-B. Wang, J.-H. Dong, H.-J. Liang, Y. Pan, Y. Dai, Z. Tan and X.-F. Wang, *Inorg. Chem.*, 2023, **62**, 13328-13337.
14. J. Yuan, B. Huang, Y. Lu, H. Xu, Y. Qiao, H. Xu, G. He and H. Chen, *Appl. Surf. Sci.*, 2023, **610**, 155480.
15. K. Min, M. Kim, C. Lim, S. E. Shim, D. Lim and S.-H. Baeck, *Int. J. Hydrogen Energy.*, 2021, **46**, 27874-27882.
16. X. Yang, X. Sun, L.-Y. Gan, L. Sun, H. Mi, P. Zhang, X. Ren and Y. Li, *J. Mater. Chem. A.*, 2020, **8**, 15140-15147.
17. G. Gao, B. Fang, Z. Ding, W. Dong, Y.-X. Li, X. L. Wang and Y.-F. Yao, *Int. J. Hydrogen Energy.*, 2023, **48**, 1831-1841.
18. H. Su, X. Zeng, L. Gui, H. Zhao and X. Zhang, *J. Mater. Chem. A.*, 2025, **13**, 17042-17053.
19. S. Sanati, A. Morsali and H. García, *Int. J. Hydrogen Energy.*, 2023, **48**, 14749-14762.
20. S. Fu, Y. Ma, X. Yang, X. Yao, Z. Jiao, L. Cheng and P. Zhao, *Appl. Catal. B Environ.*, 2023, **333**, 122813.
21. X. Liao, T. Zhang, M. Dai, W. Yuan and H. Lin, *J. Alloys Compd.*, 2023, **936**, 168303.
22. P. Zhao, S. Fu, Y. Luo, C. Peng, L. Cheng and Z. Jiao, *Small*, 2023, **19**, 2305241.
23. P. Tan, R. Gao, Y. Zhang, N. Han, Y. Jiang, M. Xu, S.-J. Bao and X. Zhang, *J. Colloid Interface Sci.*, 2023, **630**, 363-371.
24. S. Deng, X. Zhang, Y. Zhang, J. Ye, B. Mei and S. Lin, *Int. J. Hydrogen Energy.*, 2024, **51**, 550-557.
25. S. Ni, H. Qu, Z. Xu, X. Zhu, H. Xing, L. Wang, J. Yu, H. Liu, C. Chen and L. Yang, *Appl. Catal., B.*, 2021, **299**, 120638.
26. X. Lin, J. Liu, L. Wu, L. Chen, Y. Qi, Z. Qiu, S. Sun, H. Dong, X. Qiu and Y. Qin, *AIChE J.*, 2022, **68**, e17785.
27. T. Li, X. Ma, J. Wu, F. Chu, L. Qiao, Y. Song, M. Wu, J. Lin, L. Peng and Z. Chen, *Electrochim. Acta.*, 2021, **400**, 139473.
